1  
2  
3  
4  
5  
6  
7  
8  
9  
10  
11  
12  
13  
14  
15  
16  
17  
18  
19  
20  
21  
22  
23  
24  
25

## **Inherited defects in natural killer cells shape tumor immune microenvironment, clinical outcome and immunotherapy response**

Xue Xu<sup>1,2,+</sup>, Jianqiang Li<sup>1,+,\*</sup>, Jinfeng Zou<sup>3,+</sup>, Xiaowen Feng<sup>2</sup>, Chao Zhang<sup>4</sup>, Ruiqing Zheng<sup>2</sup>, Weixiang Duanmu<sup>4</sup>, Arnab Saha-Mandal<sup>2</sup>, Zhong Ming<sup>1</sup>, Edwin Wang<sup>2,5,\*</sup>

1. School of Computing, Shenzhen University, Shenzhen, China
2. University of Calgary, Cumming School of Medicine, Calgary, Alberta, Canada
3. Princess Margaret Cancer Center, University Health Network, Toronto, Ontario, Canada
4. Department of Mathematics, Dalian Institute of Technology, Dalian, China
5. Department of Medicine, McGill University, Montreal, Canada

Contact: EW ([edwin.wang@ucalgary.ca](mailto:edwin.wang@ucalgary.ca))

+ co-first authors

\* corresponding authors

26 **Abstract**

27

28 Tumor immune microenvironment (TIME) plays an important role in metastasis and  
29 immunotherapy. However, it has been not much known how to classify TIMEs and how TIMEs are  
30 genetically regulated. Here we showed that tumors were classified into TIME-rich, -intermediate and -  
31 poor subtypes which had significant differences in clinical outcomes, abundances of tumor-infiltrating  
32 lymphocytes (TILs), the degree of key immune programs' activation, and immunotherapy response  
33 across 13 common cancer types (n= ~6,000). Furthermore, TIME-intermediate/-poor patients had  
34 significantly more inherited genetic defects (i.e., functional germline variants) in natural killer (NK)  
35 cells, antigen processing and presentation (APP) and Wnt signaling pathways than TIME-rich patients,  
36 and so did cancer patients than non-cancer individuals (n=4,500). These results suggested that  
37 individuals who had more inherited defects in NK cells, APP and Wnt pathways had a higher risk  
38 of developing cancers. Moreover, in the 13 common cancers the number of inheritably defected  
39 genes of NK cells was significantly negative-correlated with patients' survival, TILs' abundance in  
40 TIMEs and immunotherapy response, suggesting that inherited defects in NK cells alone were  
41 sufficient to shape TILs' recruitment, clinical outcome, and immunotherapy response, highlighting that  
42 NK cell activation was required in the 13 cancer types to drive the recruitment of immune troops into  
43 TIMEs. Thus, we proposed that cancer was a disease of NK cell inherited deficiencies. These results  
44 had implications in identifying of high-risk individuals based on germline genomes, implementing  
45 precision cancer prevention by adoptive transfer of healthy NK cells, and improving existing  
46 immunotherapies by combining of adoptive NK cell transfer (i.e., converting TIME-intermediate/-poor  
47 tumors into TIME-rich tumors) and anti-PD-1 or CAR-T therapy.

48

49

## 50 **Introduction**

51 In the past two decades, classification of tumors based on omic data has resulted in distinct tumor  
52 molecular subtypes for each cancer type and then provided a framework to study the molecular  
53 mechanisms such as oncogenic pathways and discover drug targets for tumors. Moreover, tumor  
54 molecular subtypes enable to inform clinical outcomes and treatments. For example, treatment options  
55 can be made based on either Her2+, luminal or basal subtypes of breast cancer (<sup>1,2,3,4</sup>). However, the  
56 enormous complexity of cancer subtypes, tumor microenvironment, subclones, and somatic genomic  
57 alteration landscapes has been reported. For example, tumor molecular subtypes and patient  
58 stratifications based on tumor gene expression profiles showed that each cancer type has its own  
59 subtypes which were often unique and not commonly shared between any 2 cancer types. Each subtype  
60 has its own oncogenic pathways and somatic mutating drivers.

61 Tumor microenvironments often interact with tumor cells to affect metastasis and clinical outcomes. In  
62 the past few years, immune-checkpoint therapy (ICT) has been able to successfully eliminate tumors  
63 in 10-40% of patients with melanoma and other cancer types, however, in the majority of patients,  
64 ICT failed to have their intended effect (<sup>5,6</sup>). It has been believed that understanding of tumor  
65 infiltrated immune cells (TILs) in tumor immune microenvironment (TIME) could help in getting  
66 insights into ICT response, resistance and might improve existing immunotherapies (<sup>7,8</sup>). Infiltrating  
67 T cells are a critical component for ICT response. However, recently it has been shown that NK  
68 (natural killer) cell activation is required in melanoma to recruit CD103+ DC (dendritic cell) and then  
69 CD8+ effector T cells. Except for the TIL-T cell recruitment function, the best-known role of NK cells  
70 is cancer cell killing and tumor immunosurveillance. To fulfill this function, distinct from T and B  
71 cells, NK cell is not mediated by antigen specificity but through multiple germline-encoded activating  
72 and inhibiting receptors (<sup>9,10,11</sup>), the complex balance of inhibitory and activating signals promotes  
73 self-tolerance or drives potent effector function of NK cells.

74 Historically, tumor molecular subtypes have generated lots of insights into the underlying molecular  
75 mechanisms of tumorigenesis, metastasis and informing of treatments. With advances of cancer ICT,  
76 CAR-T and other immunotherapies, it has a strong interest in stratifying TIMEs into TIME subtypes.  
77 Further stratification of patients on the basis of their TIMEs could discover better insight into overall  
78 survival and underlying molecular mechanisms for ICT response and help identify new  
79 immunotherapeutic targets. However, so far, we have no idea how to study TIMEs and lack of efficient  
80 tools to classify TIMEs. Here we conducted an analysis of the omic data (i.e., tumor RNA-seq and

81 whole-exome sequences of germline genomes) of TCGA (The Cancer Genome Atlas) cancer patients  
82 (n~6,000) representing 13 common cancer types, and a non-cancer cohort (n=4,500) to show that  
83 tumors were classified into three universally distinct TIME subtypes across the 13 common cancer  
84 types. They were different in prognosis, TILs' abundance and degree of immune programs' activation,  
85 regardless of cancer type. Inherited defects of NK cells, antigen processing and presentation (APP) and  
86 Wnt pathways in patients' germline genomes modulated TIME subtypes and ICT response.  
87 Importantly, we showed that inherited defects in NK cells alone were sufficient to regulate TILs'  
88 abundance in TIMEs, clinical outcomes and immunotherapy response. Further, individuals who have  
89 inherited defects in NK cells, APP and Wnt pathways bear high-risk of developing cancers.

## 90 **Results**

### 91 **Three universal TIME subtypes across 13 common cancers**

92 To classify tumors into TIME subtypes, we applied the unsupervised clustering of gene expression  
93 data (i.e., melanoma data from TCGA) based on a set of genome-wide CRISPR-Cas9 screen-  
94 determined essential genes (i.e., ICT essential genes, n=1,294) from a previous study<sup>(12)</sup> and other  
95 known tumor immune-related genes<sup>(13,14)</sup> (see Methods). We found that melanoma tumors were  
96 classified into three TIME subtypes (Fig 1a). Similarly, the three TIME subtypes were repeatedly  
97 obtained in the 13 common cancer types (Supplementary Fig 1): bladder urothelial carcinoma (BLCA),  
98 breast invasive carcinoma (BRCA), cervical squamous cell carcinoma and endocervical  
99 adenocarcinoma (CESC), colon adenocarcinoma (COAD), head and neck squamous cell carcinoma  
100 (HNSC), kidney renal clear cell carcinoma (KIRC), lower grade glioma (LGG), lung adenocarcinoma  
101 (LUAD), lung squamous cell carcinoma (LUSC), pancreatic adenocarcinoma (PRAD), skin cutaneous  
102 Melanoma (SKCM), stomach adenocarcinoma (STAD), thyroid carcinoma (THCA) and uterine corpus  
103 endometrial carcinoma (UCEC). These results suggested that TIME subtypes were much simpler than  
104 tumor molecular subtypes, each of which was unique and couldn't be shared by any two cancer types.  
105 Thus, the universal TIME subtypes provided a means to identify subtypes' unifying features and to  
106 understand the underlying common molecular mechanisms of each TIME subtype.

107

108 To discover the common features and critical differences which defined the 3 distinct TIME subtypes,  
109 we compared their gene expression profiles, TILs' abundance in TIMEs and clinical outcomes. The  
110 abundance of TILs in TIMEs were significantly decreased from TIME-rich ('immune-hot' tumors), -  
111 intermediate ('immune-cold' tumors) to TIME-poor subtype ('immune-desert' tumors) (Fig 1b,  
112 Supplementary Table 1). It has been known that TILs are associated with tumor prognosis, thus we

113 hypothesized that clinical outcomes could be different between TIME subtypes. In fact, both TIME-  
114 poor and -intermediate tumors had significantly poorer clinical outcomes than TIME-rich tumors (Fig  
115 1c), however, patient survival differences were not significant between TIME-poor and -intermediate  
116 tumors. Pathway enrichment analysis of the significantly modulated genes between subtypes showed  
117 that the degree of the activated (i.e., represented by gene expression of each pathway or program)  
118 immune programs such as APP, NK cell-mediated cytotoxicity, T cell receptor signaling pathways were  
119 significantly decreased from TIME-rich, -intermediate to -poor subtype (Fig 1d and Supplementary Fig  
120 2). These results suggested that TIME-poor and -intermediate tumors had a lower degree of activated  
121 immune programs so that they could have a better chance to escape immunosurveillance. For example,  
122 APP is an immunological process that prepares and presents antigens to T cells. NK effector and T cell  
123 receptor signaling pathways function as tumor cell killing. Therefore, lower activity of APP, NK cells  
124 and T cell receptor signaling allow tumor cells to have fewer immune constraints. These results were  
125 repeatedly observed across the 13 common cancer types, suggesting that the TIME subtypes are not  
126 only universal subtypes across cancer types but also share common cellular and clinical features.

127

128 In general, TIME-rich, -intermediate and -poor tumors represent 25.35%, 32.94%, and 41.70% of the  
129 tumors, respectively, depending on cancer types (Supplementary Table 2). These results indicated that  
130 TIME-rich patients represent only a small fraction of tumors, and more than 70% of the tumors are  
131 either TIME-poor or -intermediate tumors, most of which are known to non-respond to ICT. These  
132 results explain why only 10-40% of tumors (i.e., depending on the cancer type) respond to ICT.

### 133 **Inherited defects in NK cells shape TIME subtypes and clinical outcomes**

134 The discovery of the universal TIME subtypes across the 13 common cancer types triggered us to  
135 hypothesize that the TIME subtypes could be modulated by common genetic regulators. We previously  
136 proposed that pre-existing inherited variants in germline genomes of cancer patients could play an  
137 important role in shaping somatic mutations, CNVs and oncogenic pathways in their paired tumor  
138 genomes<sup>(15)</sup>. Furthermore, we have shown that inheritably functional variants of breast cancer patients  
139 significantly predicted tumor recurrence<sup>(16,17)</sup>, and the risk for breast, brain and other cancers<sup>(18)</sup>.  
140 Moreover, inheritably functional variants of patients could be used to predict key somatic-mutated  
141 genes in their paired tumor genomes (Zaman et al., unpublished data). Finally, cancer patients'  
142 germline genomes contain specific genomic patterns which are associated with cancer risk and clinical  
143 outcomes (Feng et al., unpublished data). These results raised a question whether cancer patients'  
144 germline genomes modulated TIME subtypes.

145 To answer this question, we compared the functional germline variants (termed as inherited defects  
146 here, see Methods) of the patients between TIME subtypes and showed that genetic makeups of the  
147 patients were significantly different between them (Supplementary Fig 3): TIME-poor/-intermediate  
148 and TIME-rich patients had significantly differentially inherited genetic defects. Further pathway  
149 enrichment analysis showed that more than 30% of the defected or modulated pathways were  
150 associated with NK cell deficient phenotypes, NK cell-associated virus infections, and the NK cell-  
151 mediated cytotoxicity pathway (Fig 2a, Supplementary Fig 4). For example, among the significantly  
152 differential pathways and phenotypes, 7 of them were known NKD (NK cell deficiency) phenotypes  
153 (<sup>19, 20, 21</sup>) such as Epstein-Barr virus (EBV) infection, Herpes simplex infection, Leishmaniasis,  
154 Rheumatoid arthritis, Type I diabetes mellitus, long-term depression and viral myocarditis, while 7 of  
155 them were NK cell-related virus infections such as Graft-versus-host disease, HTLV-I infection,  
156 Hepatitis B and C, Influenza A, Asthma and IBD (Fig 1d, 2a, and 2b). These results strongly suggested  
157 that TIME-poor/-intermediate patients might have more inherited defects in their NK cells than TIME-  
158 rich patients.

159

160 NK cells are the ‘first-line immune cells’ which enable to quickly detect and attack tumor cells and  
161 viruses. NK cells are able to control tumorigenesis by accurately regulating the distinct germline  
162 encoded inhibitory and activating NK cell surface receptors. In general, an excess of activating over  
163 inhibitory signals triggers the production and release of effector molecules, which can lead to the death  
164 of the infected or transformed cancer cell (<sup>22</sup>). Thus, to further explore the association between NK cell  
165 inherited defects with cancer progression and metastasis, we compiled a comprehensive set of NK cell  
166 genes including NK cell receptors and ligands, genes in NK cell signaling pathways (i.e., KEGG NK  
167 cell-mediated cytotoxicity pathway (<sup>23, 24, 25</sup>), and then conducted Fisher’s tests to identify genes which  
168 had significantly differential frequencies between TIME-rich group and TIME-poor/-intermediate  
169 group. For a given cancer type, we found 15-20 defected NK cell genes which had significantly higher  
170 frequencies in TIME-poor/-intermediate group than TIME-rich group (FDR-corrected  $p < 0.25$ ). The  
171 gene list for each cancer type was different, which could be associated with the diversity of tissue-  
172 resident NK cells, although many of the significantly defected NK cell genes of the 13 cancer types  
173 were shared. In total there were 103 such genes (i.e., termed as NK-genes here), 70 of which appeared  
174 in at least two cancer types. Among the 70 NK-genes, 37.2%, 25.8%, 24.3%, and 12.7% are known  
175 NKD genes (<sup>19, 20, 21</sup>), NK cell receptors and ligands, NK cell signaling genes but also expressed in cell  
176 signaling in T or other immune cells (i.e., mainly innate immune cells, termed as ‘global immune cell

177 genes' here) and universal genes (i.e., expressed in many cell types), respectively (Supplementary  
178 Tables 3 and 4).

179

180 We further asked if inherited defected NK-genes were correlated with clinical outcomes. To answer  
181 this question, for each cancer type, we top-to-bottom ranked the patients based on the number of  
182 inheritably defected NK-genes. We defined top 40% and bottom 40% of the ranked patients as high-  
183 and low-NK cell defected groups, respectively, to conduct survival analysis. In 10 of the 12 cancer  
184 types (i.e., no survival data were available for THCA) except LGG and KIRC, the high-NK cell  
185 defected group had significantly shorter survival than the low-NK cell defected group (Fig 3a).  
186 Similar results were obtained when using top 30% and bottom 30% of the ranked patients as high-  
187 and low-NK cell defected groups, respectively. These results suggested that NK cells inherited  
188 defects could play an important role in tumor recurrence and overall survival in most of the cancer  
189 types. Given the fact that TILs' abundance was different between TIMEs, we hypothesized that NK  
190 cell defected gene number could be negatively correlated with the TILs' abundance in TIMEs.

191 Indeed, it was true that for all the 13 cancer types (Fig 3b, Supplementary Fig 5), the abundance of  
192 immune cell troops such as NK, NKT, CD103+ DC (cDC), activated CD8+ T, CD4+ T, activated B, all  
193 kinds of T cells and 23 other types of immune cells were negatively correlated with the defected gene  
194 number in NK cells, suggesting that NK cells could be an important factor in recruiting other immune  
195 cells into TIMEs.

196

197 NKD genes and NK cell receptors/ligands are more preferentially involved in either NK cell-mediated  
198 cytotoxicity, NK cell development or proliferation (<sup>11,26</sup>), while the global immune cell genes could  
199 influence the immune response of not only NK cells but also other immune cells. On the other hand,  
200 the universal genes play important roles in cell signaling of not only NK cells but also other cell types  
201 including tumor cells. Therefore, NKD genes and NK receptors/ligands are more NK cell-specific (i.e.,  
202 representing 63% of the NK-genes, termed as NK-specific-genes here), while the global immune cell  
203 genes (i.e., representing 24.3% of the NK-genes) and the universal genes (i.e., representing 12.7% of  
204 the NK-genes) are expressed in multiple immune cells and non-immune cell types, respectively. Thus,  
205 we raised a question whether the correlations observed in Fig 3a, 3b and Supplementary Fig 5 were  
206 truly from NK cell defected genes. By extending the same analyses in Fig 3a and 3b using only the  
207 universal genes, there were not any correlation as shown in Fig 3a and 3b, suggesting that inherited  
208 defects in the universal genes alone are insufficient to modulate either TILs in TIMEs or clinical  
209 outcomes. Next, we re-did the same analyses by combining of the universal genes and the global



210 immune cell genes (i.e., representing 37% of the NK-genes, termed as NK-immune-universal-genes  
211 here) and the NK-specific-genes, respectively. For the NK-immune-universal-genes, correlations, as  
212 shown in Fig 3a (i.e., survival), were not observed, on the other hand, for the NK-specific-genes, such  
213 correlations were reproduced across the 10 cancer types. These results suggested that the NK-specific-  
214 genes are sufficient to shape clinical outcomes, but the NK-immune-universal-genes were not.

215

216 Similarly, significantly negative correlations between TILs' abundance in TIMEs and the number of  
217 the inheritably defected NK-specific-genes were reproduced in 10 cancer types including BLCA,  
218 BRCA, KIRC, LAUD, LUSC, THCA, UCEC, HNSC, LGG, and SKCM (Fig 3b, Supplementary Fig  
219 5). In particular, the correlations derived from the NK-specific-genes were much stronger than those  
220 derived from the NK-genes in 7 cancer types (i.e., BLCA, BRCA, KIRC, LAUD, LUSC, THCA and  
221 UCEC, Fig 3b, Supplementary Fig 5). On the other hand, weaker negative correlations (i.e., correlation  
222 co-efficiencies were 2-10 times less than those derived from the NK-genes) and weaker statistical  
223 significances (i.e., p values in the range of 0.01-0.05) were observed for some immune cells in some  
224 cancer types when using the NK-immune-universal-genes (Fig 3b, Supplementary Fig 5). These results  
225 suggested that inherited defects of the NK-specific-genes are sufficient to impair communications  
226 between NK cells and other immune cells and then block TILs' recruitment into TIMEs. Of note, in  
227 COAD, STAD, and PRAD, both NK-specific-genes and NK-immune-universal-genes did not  
228 reproduce the negative correlation (i.e., for TILs in TIMEs) derived from the NK-genes. PRAD has  
229 dense stroma<sup>(27)</sup> which could need the whole NK gene set (i.e., NK-genes) for TILs' recruitment. NK  
230 cells surrounding both COAD and STAD are directly interacting with environmental factors such as  
231 microbiome, food, drinks, and others so that NK cells associated with both COAD (colon cancer) and  
232 STAD (gastric cancer) are much more complex. These data highlighted that inherited defected in NK  
233 cells are one of the key genetic factors in shaping TIME subtypes, TILs' abundances and clinical  
234 outcomes.

235

236 Based on these insights, we hypothesized that NK cell was a critical factor for recruiting immune  
237 troops into TIMEs. This hypothesis is partially supported by two recent studies which had no idea  
238 about NK cell inherited defects<sup>(27, 28)</sup>, but showing that depletion of NK cells resulted in failed  
239 recruitment of CD8+ T cells to the tumor microenvironment in melanoma mice. They further showed  
240 that NK cells recruited CD103+ DC, which in turn were required for the recruitment of effector T  
241 cells. Our results here suggested that NK cells could be able to recruit not only CD103+ DC (cDC) and  
242 CD8+ T cells but also 30 other immune cells. Because NK cells act as first responders to detect and



243 kill cancer cells, it is reasonable to believe that NK cells could sequentially recruit many other  
244 immune cells including CD103+ DC and T cells into the tumor microenvironment. Thus, NK cells  
245 could recruit a whole immune troop but not only one or two immune cell types into TIMEs.

246

247 This insight provides a potential opportunity that adoptive cell transfer of NK cells from healthy donors  
248 could convert a TIME-poor tumor into a TIME-rich tumor. Adoptive NK cell was safe and does not  
249 cause a graft-versus-host disease attack on the recipients. Thus, we hypothesized that adoptive NK cell  
250 transfer of healthy donors (i.e., allogeneic) to a patient could have better clinical outcomes than the  
251 adoptive transfer of NK cells from the patients themselves (i.e., allogeneic) because cancer patients'  
252 own NK cells are defected and don't function very effectively. This hypothesis is supported by a recent  
253 clinical trial showing that allogenic adoptive NK cell transfer was much better than autogenic NK cell  
254 immunotherapy for breast cancer outcomes (29). TIME-rich tumors are more suitable to conduct  
255 immunotherapy than TIME-poor tumors, while TIME-rich tumors can gain significantly more survival  
256 benefit than TIME-poor tumors for neoadjuvant chemotherapy as well. For example, a meta-analysis of  
257 13 studies showed that higher abundance of TILs in pre-treatment tumor biopsy was correlated with  
258 better pathological complete response rates to neoadjuvant chemotherapy(30, 31, 32, 33, 34). Therefore, it is  
259 a great interest to improve patient outcomes by applying adoptive transfer of healthy, functional NK  
260 cells to convert TIME-poor tumors into TIME-rich tumors which could be in turn treated with  
261 chemotherapy or immunotherapy. A recent clinical trial partially supported this hypothesis: adoptive  
262 transfer of NK cells in combination with chemotherapy in stage IV colon cancers significantly  
263 prevented recurrence and prolonged survival than chemotherapy alone. Most importantly, they found  
264 that poorly differentiated colon cancers were more susceptible to adoptive NK cell transfer than well-  
265 differentiated ones (35). Poorly and well-differentiated cancers are shorter and longer survival patients,  
266 respectively, which are corresponding to TIME-rich and -poor tumors, respectively. Therefore, these  
267 results agree with our above hypothesis. Another study also supported this hypothesis: the combination  
268 therapy of anti-PD-1 antibodies and activated autologous NK cells significantly delayed tumor  
269 progression in glioma-bearing animals as compared to the monotherapy regimens of anti-PD-1 or  
270 stimulated NK cells alone ( $P < 0.001$ )(36).

271

## 272 **Tumorigenesis and metastasis are not random events and cancer patients are highly selected**

273 As shown in Fig 2a and Supplementary Fig 4, except NK cell inherited defects, TIME-poor/-  
274 intermediate patients had significantly more defected APP and Wnt pathway genes than TIME-rich  
275 patients. APP is a biological process which presents antigens to T cells, functional defects in APP could

276 lead tumor cells to escape T cell surveillance. However, careful analyses showed that APP pathway  
277 genetic defects were not significantly associated with clinical outcomes and TILs' abundance. These  
278 results suggested that APP pathway defects alone were not sufficient to shape either clinical outcomes  
279 or TIME subtypes. In addition, it has been shown that activated Wnt signaling pathway in tumors  
280 excluded the recruitment of T cells into TIMEs (<sup>37</sup>). Furthermore, somatic mutations of the Wnt  
281 pathway in tumors could activate the pathway to prevent T cells to be recruited into TIMEs (<sup>38</sup>). Here  
282 we showed that in most of the cancer types the number of inherited defects in Wnt pathway in germline  
283 genomes had a positive correlation with the gene expression of the Wnt pathway (i.e., pathway  
284 activation) in their paired tumors, suggesting that a positive correlation between inherited defects in the  
285 Wnt pathway and activation of the pathway, which is similar to the somatic mutations in genes of the  
286 pathway.

287

288 The number of the inheritably defected genes in the Wnt pathway had weakly negative correlations  
289 (i.e., with marginally significant p values in the range of 0.02-0.05) with clinical outcomes in 8 cancer  
290 types (i.e., BLCA, BCRA, HNSC, LAUD, LUSC, PRAD, STAD and UCEC) and no such correlation  
291 with other cancer types (Supplementary Fig 6). Similarly, Wnt pathway inheritably defected gene  
292 number had negative correlations with the abundance of TILs in TIMEs (Supplementary Fig 7) in eight  
293 cancer types (i.e., HNSC, KIRC, LGG, LUAD, LUSC, SKCM, STAD and THCA), however, the  
294 correlations were weaker (i.e., in terms of correlation co-efficiencies and correlation significance  
295 represented by p values) than those derived from NK cells. These results suggested that inheritably  
296 defected in Wnt pathway could shape TILs' recruitment in some cancer types, and the influences were  
297 much weaker than NK cells. Next, we asked if inheritably defects of the Wnt pathway and NK cells  
298 worked in a synergy manner. To answer this question, we conducted the correlation analysis using the  
299 genes combined from the NK cells and the Wnt pathway and showed that negative correlations  
300 between the inheritably defected gene number and the TILs' abundance in TIMEs remained in eight  
301 cancers but much weaker than the correlations derived from either NK cells or Wnt pathway alone.  
302 These results suggested that both NK cells and Wnt pathway were parallel and complementary  
303 modulators to shape TILs recruitment, implying that to reverse immune exclusion in TIMEs, Wnt  
304 signaling inhibitors could be better than adoptive NK cell transfer in some tumors but not most of the  
305 tumors.

306

307 Together with the discovery that TIME-rich tumors have significantly longer survival than TIME-  
308 poor/-intermediate patients, we concluded that inherited defects in NK cells and Wnt pathways were

309 associated with metastasis and clinical outcomes. These results highlighted that metastasis is affected  
310 by inherited defects and is not a random process. Similarly, significantly more inherited defects in NK  
311 cells, APP and Wnt pathways were observed between non-cancer individuals and cancer patients in the  
312 13 common cancer types (Supplementary Fig 8). They were even more significant between TIME-  
313 poor/-intermediate patients and non-cancer individuals (Fig 2b and Supplementary Fig 9). These results  
314 suggested that individuals who bear inherited defects in NK cells, APP and Wnt pathways have a  
315 higher risk to get cancer. This hypothesis is indirectly supported by a study showing that individuals  
316 with lower NK cytotoxic activity in peripheral blood had a higher incidence of cancer (n=3,500 with  
317 11-year follow-up)<sup>39</sup>). Similarly, previous studies showed that impaired NK cell activity was found in  
318 family members of patients with different types of cancer (<sup>40, 41, 42</sup>). Importantly, such inherited defects  
319 in NK cells, APP and Wnt pathways were repeatedly observed between non-cancer and cancer  
320 individuals (Fig 2b, Supplementary Fig 9), between TIME-rich and TIME-intermediate/-poor patients  
321 (Fig 2a, Supplementary Fig 4, Fig 1d), suggesting that these individuals were highly selected for  
322 tumorigenesis and metastasis. The immune programs (defects in NK cells, APP and Wnt pathways) are  
323 carried from germline genomes to their paired tumors. In fact, the number of inherited defects in the  
324 NK cells, APP and Wnt pathways was gradually increased from the non-cancer cohort, TIME-rich, -  
325 intermediate to -poor subtypes, suggesting that inherited defects in the NK cells, APP and Wnt  
326 pathways have a profound impact on cancer risk, TIME subtypes and clinical outcomes. These insights  
327 provided a potential opportunity to identify high-risk cancer subpopulation based on the inherited  
328 defects in NK cells, APP and Wnt pathways, further, adoptive NK cell transfer from healthy donors to  
329 high-risk individuals could postpone or prevent cancer development. This hypothesis is partially  
330 supported by a study showing that NK cell depletion in melanoma mice resulted in substantial  
331 metastasis, but the adoptive transfer of NK cells protects NK cell-deficient mice from tumor  
332 establishment (<sup>43</sup>).

333

334 In addition, as shown in Fig 2b, Type I diabetes and long-term depression phenotypes were linked to  
335 some cancers, suggesting that they were genetic diseases as well. Diabetes and obesity have been  
336 shown to be a risk factor for some cancers, for example, a meta-analysis of 121 cohorts including 20  
337 million individuals and one million events confirmed that diabetes is a risk factor for all-site cancer  
338 (<sup>44</sup>), while obesity can increase cancer incidences of 13 cancer types (<sup>45</sup>). A 24-year follow-up study  
339 showed that depression increases the risk of cancer (<sup>46</sup>), Moreover, a meta-analysis of 16 studies  
340 (n=163,000) showed that cancer patients with anxiety and depression had a greater risk of dying from  
341 all types of cancer (<sup>47</sup>). Impairing of the NK cell function is one of the common factors behind these

342 links. For example, obesity has been known to impair NK cell function and then lead to an increased  
343 risk for severe infections and several cancer types (<sup>48, 49</sup>), while chronic family stress is consistently  
344 associated with decreases in NK cell cytotoxicity (<sup>50</sup>). These results indicated that NK function  
345 impaired by either genetic defects or regulatory factors such as depression, obesity and diabetes could  
346 increase cancer incidence.

347

### 348 **TIME subtypes could guide in immunotherapies**

349 As shown above, both NK cell-mediated cytotoxicity and Wnt signaling pathways became the  
350 hallmarks which enabled to significantly distinguish TIME-rich and TIME-intermediate/-poor  
351 subtypes. From the ICT clinical trials (<sup>51,52</sup>), we obtained 49 melanoma (SKCM, 10 responders) and 47  
352 gastric (STAD, 12 responders) samples which had tumor RNA-Seq data before administrating of ICT.  
353 We used the significantly modulated genes of both pathways between TIME subtypes to assign the  
354 ICT-clinical trial samples into either TIME-rich or TIME-intermediate/-poor group based on the k-  
355 nearest neighbor algorithm (KNN, see Methods). By doing so, 70% and 30% of the ICT-responding  
356 melanoma were assigned into TIME-rich and TIME-intermediate/-poor group, respectively. In contrast,  
357 56% and 44% of the ICT non-responding melanoma were assigned into TIME-rich and TIME-  
358 intermediate/-poor group, respectively. Similarly, 58% and 42% of the ICT-responding gastric tumors  
359 were assigned into TIME-rich and TIME-intermediate/-poor group, respectively. In contrast, 31% and  
360 69% of the ICT non-responding gastric tumors were assigned into TIME-rich and TIME-intermediate/-  
361 poor group, respectively. Not surprisingly, these results indicated that TIME-rich patients were  
362 enriched with ICT responders. Pathway enrichment analysis of tumor gene expression profiles showed  
363 that TIME-rich non-responders had significantly higher gene expression in Wnt pathway (FDR-  
364 corrected  $p=5.3 \times 10^{-12}$  and  $4.0 \times 10^{-5}$  for melanoma and gastric tumors, respectively) than TIME-rich  
365 non-responders, suggesting that using of Wnt inhibitors could improve ICT treatment for TIME-rich  
366 non-responders. Similarly, genes of the NK cell-mediated cytotoxicity pathway (FDR-corrected  
367  $p=2.5 \times 10^{-3}$  and  $2.7 \times 10^{-3}$  for melanoma and gastric tumors, respectively) and APP (FDR-corrected  
368  $p=7.1 \times 10^{-4}$  for melanoma) were significantly lower expressed in TIME-intermediate/-poor non-  
369 responders than TIME-intermediate/-poor responders, suggesting that adoptive NK cell transfer in  
370 combination with CAR-T or ICT could improve the existing immunotherapies for TIME-intermediate/-  
371 poor non-responders. However, it should be cautious about these conclusions due to the small number  
372 of clinical trial samples (n=96) here, more samples are needed to further validate these discoveries in  
373 the future.

374

375

## 376 **Discussion**

### 377 **A unified view of the tumor immune microenvironment**

378 Tumor molecular subtypes could inform not only prognosis but also treatment. Here we showed that  
379 TIMEs can be classified into three universal subtypes across 13 common cancer types. Different from  
380 previous observations of the complex tumor molecular subtypes, each of which often has its own  
381 unique features, the universal TIME subtypes were commonly shared by multiple cancer types,  
382 providing a framework to get better insight into the unifying features of each TIME subtype and the  
383 differences between the distinct TIME subtypes, and then understand why some tumors respond to  
384 immunotherapy and some don't. Furthermore, this framework allows exploring genetic factors to  
385 regulate TIMEs and could help in identifying new druggable targets. Regardless of cancer types, TIME  
386 subtypes have unifying features: (1) TIME-rich patients have significantly longer survival than other  
387 TIME subtypes, because (2) the abundance of the TILs in TIME-rich, -intermediate and -poor tumors is  
388 gradually decreased. These features recaptured the known immune-hot, -cold and -desert tumors  
389 described previously based on immunohistochemistry (<sup>53,54</sup>). It has been well-known that a lower  
390 abundance of TILs in TIMEs is associated with more cancer recurrence and shorter survival (<sup>55,56</sup>). (3)  
391 signaling pathways associated with key immune programs such as APP, NK, and T cell signaling were  
392 more highly activated in TIME-rich tumors than TIME-intermediate/-poor tumors. The degree of the  
393 activated immune programs (i.e., represented by the expression levels of the pathway genes) was  
394 gradually decreased from TIME-rich, -intermediate to -poor tumors. Lower level expression of the  
395 genes in these immune-programs and pathways will allow tumors to escape from immune attack. (4)  
396 finally, ICT-responders were more enriched in TIME-rich tumors.

397

### 398 **Cancer is an NK cell deficient disease**

399 The hypothesis of cancer immunosurveillance suggests that tumor cell transformation occurs  
400 frequently, but is under constant control by the immune system. The immune system is able to identify  
401 transformed cells that have escaped cell-intrinsic tumor-suppressor mechanisms and eliminate them  
402 before they can establish malignancy (<sup>57</sup>). Thus, if the individuals are genetically immunodeficient,  
403 they could have a markedly increased incidence of cancer. In general, NK cells have a large repertoire  
404 of germline-encoded inhibitory and activating receptors to sense 'danger' in the cell surfaces. The  
405 germline-encoded receptors which recognize ligands associated with viral infection or cancer cell  
406 transformation (<sup>10</sup>). Genetic defects in NK-genes including NK cell receptors and NKDs could impair  
407 NK cell functions. By conducting an unbiased scanning of germline genomes of cancer patients, we

408 provided a clearer view of the spectrum of malignancies associated with impaired NK cells and showed  
409 that inherited defects affecting NK cell functions were sufficient to accomplish cancer  
410 immunosurveillance of the immune system.

411

412 Among highly related pathways (i.e., NK cells, APP and Wnt pathways) examined, only NK-genes'  
413 defects were correlated with both survival and the abundance of TILs in TIMEs. Most importantly, in  
414 10 out of the 12 common cancers (i.e., no survival data were available for THCA), defects of the NK-  
415 specific-genes (i.e., NKDs + NK cell receptors) alone were sufficient to establish these correlations  
416 (i.e., survival and TILs' abundance). Traditionally, the hypothesis of cancer immunosurveillance  
417 mainly focuses on T cell or other immune cells for their cell-killing function. Here we demonstrated  
418 that to implement cancer immunosurveillance, NK cells could play a critical role in communicating  
419 with many immune cells to recruit the whole immune troops into the cancer-transformed cell or  
420 TIMEs. Specifically, our results suggested that NK cells could have two functions for controlling tumor  
421 progression and metastasis: (1) cancer cell killing (2) recruiting immune troops into TIMEs. Here we  
422 proposed a working model for NK cell-based immunosurveillance: NK cells are the first to arrive in the  
423 tumor microenvironment and recruit CD103+ DC through the secretion of chemokines. TIL-DCs then  
424 recruit effector T cells. Activated NK cells produce numerous cytokines, communicate with other 30  
425 immune cells, and then recruiting the immune troops into the cancer cell or TIMEs. Anti-tumor  
426 and anti-metastasis activity (i.e., survival differences between TIME subtypes) is thus the result of the  
427 collaboration of distinct innate and adaptive immune cell types. Thus, inheritably defected NK-genes  
428 could impair NK cell function and then block to recruit the immune troops to the cancer cell or into  
429 TIMEs to conduct the anti-tumor activity. Thus, we proposed that cancer is largely a disease of NK cell  
430 deficiencies. This working model unraveled the cellular and molecular determinants (i.e., NK cells) of  
431 multiple immune cell recruitment to and retention in solid tumors' TIMEs. Thus, allogeneic adoptive  
432 NK cell therapy (i.e., collecting healthy NK cells which have no inherited defects from donors and  
433 infusing them into the patient) could convert immunotherapy-resistant, TIME-poor tumors into  
434 ICT/CAR-T-sensitive, TIME-rich tumors. This NK cell therapy could be a universal approach which is  
435 independent of cancer types. Given the fact that more than 70% of the cancer patients are immune-cold  
436 and -desert subtypes, successfully validating of this hypothesis will be a crucial step toward improving  
437 the existing immunotherapies.

438

439 In addition, our results suggested that inherited defects in NK cells, APP and Wnt pathways were  
440 positively selected in tumorigenesis and metastasis. Therefore, cancer patients are highly selected, and



441 thus, it provides an explanation for the fact that only 12-20% of the heavy smokers develop lung cancer  
442 in their lifetime, although 85% of the lung cancer patients are heavy smokers (<sup>58, 59</sup>). Cancer causally  
443 environmental factors play an important role in tumorigenesis, however, without a susceptible germline  
444 genome (i.e., genetic defects in NK cells, APP and Wnt pathways), they still cannot induce cancer. We  
445 proposed that germline genome is the most important factor in determining if a person will get cancer  
446 in one's lifetime, and cancer is the result of the interactions between high-risk germline genomes and  
447 risk-factors (i.e., environmental factors and lifestyles).

448 Thus, the discoveries in this study could open a new window to explore NK cell biology and lead to  
449 novel thinking about identifying high-risk individuals for early cancer detection, precision cancer  
450 prevention, and immunotherapy. Strategies to harness and augment NK cells for cancer therapy are  
451 relatively new and rapidly developing field and have not been used for cancer prevention yet. The  
452 concept that cancer is an NK cell deficient disease could lead this field to new directions: (1)  
453 identifying of high-risk population based on NK cell, APP and Wnt pathways' inherited defects, so that  
454 early cancer detection or precision prevention (i.e., by avoiding exposure to smoking, UV lights and  
455 other risk factors) could be implemented. (2) Preventing or postponing of cancer development for the  
456 high-risk population by adoptive NK cell transfer. (3) Converting TIME-poor/-intermediate tumors into  
457 TIME-rich tumors by manipulating NK cells, adoptive NK cell transfer or using Wnt signaling  
458 inhibitors so that ICT or CAR-T therapy could be applicable. Finally, many open questions still  
459 remained, for example, defected genes in NK cells were largely shared by different cancer types,  
460 however, each cancer type has some unique NK cell gene defects. Given the fact that tissue/organ-  
461 resident NK cells are different and diverse (<sup>60</sup>), additional studies will be needed to elucidate if defected  
462 genes are dominantly expressed in tissue/organ-resident NK cells. If so, adoptive transfer of tissue-  
463 resident NK cells could be considered to be more efficient in cancer prevention and TIL's recruitments.  
464 NK cells share lots of expression programs with NKT cells, which is a subset of innate-like T cells.  
465 Both NK cells and NKT cells are cytotoxic cells, which trigger innate immune responses, provide the  
466 first level of defense against infected cells and tumor cells, produce cytokines and trigger immune  
467 responses without a prior sensitization by the immune system. Along with this long, we suspected that  
468 the inherited defects in NKT cells could also play similar roles which were discussed in this study,  
469 although the cell number of the NK cells is nearly 200 times of the NKT cells.

470



## 471 **Methods**

### 472 **Datasets**

473 Based on the availability of the whole exome sequencing (WES) of germline genomes, their paired  
474 tumor genomes, and paired RNA-seq data, 14 common cancer types were selected from TCGA (n=200  
475 at least for each cancer type). To remove the effects of virus-infection for the NK cell study, we  
476 removed the virus-infected tumors. Only 15% of the liver tumors (i.e., this number is too small to  
477 conduct analysis) without virus infection, thus, we excluded this cancer type for further analysis. Thus,  
478 13 common cancers used in this study were BLCA, BRCA, COAD, LGG, HNSC, KIRC, LUAD,  
479 LUSC, PRAD, SKCM, STAD, THCA, and UCEC. Because the primary melanoma samples were not  
480 many, only metastatic SKCM samples were included for analysis. Distinct clinical subtypes have been  
481 reported in breast cancer, thus we took only the ER+ breast tumors in this study because the sample  
482 numbers of HER2+ and triple negatives are small in TCGA. The WES files derived from buffy coats  
483 (normal samples) of these cancer patients (n=5,883) were downloaded from TCGA, and the normalized  
484 RNA-sequencing data with Root Mean Square Error (RMSE) across 13 types of cancers (n=5,373)  
485 were downloaded from FireBrowse. The WES files of 4,500 non-cancer individuals (phs000473.v2.p2,  
486 phs000806.v1.p1, phs001194.v2.p2) were downloaded from The database of Genotypes and  
487 Phenotypes (dbGaP). RNA-sequencing data of 49 ICT-clinical trial melanoma sample and 47 ICT-  
488 clinical trial gastric samples were collected from GSE91061 and PRJEB25780, respectively, and were  
489 processed based on the mRNA analysis pipeline in TCGA.

490

### 491 **Variant calling and germline variant determination**

492 For TCGA WES files, variant calling was performed using VarScan (version 2.3.9). The thresholds for  
493 germline variant calls required variant allele fraction (VAF) between 45% and 55%, and >90%.  
494 Functional variants were examined and annotated using the Combined Annotation Dependent  
495 Depletion (CADD) using the default parameters. To keep the consistency with the TCGA pipeline for  
496 processing WES data of the non-cancer individuals, BWA (version 0.7.15) was used to align with  
497 default parameters, piping into Samtools (version 0.1.8) to sort. Additional adding read groups and  
498 duplicate removal were processed with Picard-tools (version 2.6.0). The resulted BAM files were  
499 processed with GATK (version 4.0.11.0) for realignment and base recalibration. VarScan (version  
500 2.3.9) and CADD were used to call and annotate functional germline variants.

501

502

503

## 504 **Immune gene set and clustering analysis**

505 Immune-related genes (n=1,384) including MHC system-related genes [61], immunophenoscore-related  
506 genes [14], ICT essential genes for immunotherapy [12] and cytotoxic T cell-resistant genes [62] were  
507 collected and identified as critical immune-related genes (the gene pool  $G$ ). RNA-sequencing data of  
508 melanoma patients in TCGA were used to screen the key genes.

509

510 Step#1 Initialize the candidate set of key genes, that is,  $G_{candidate} = \phi$

511 Step#2 Randomly select 30% genes from  $G$  in the gene set  $G_{random}$ .

512 Step#3 Replace the features of elements in the patient set  $P$  with  $G_{random}$  to form the sample set  $S_{random}$ .

513 Step#4 Group the samples  $S_{random}$  by using the hierarchical clustering method. For each of the clustering,  
514 cValid (63) was used to evaluate the clustering stability and the most stable clustering number was  
515 recorded.

516 Step#5 Repeat Steps 2-4 100,000 times. Rank the most stable clustering numbers and select the most  
517 suitable clustering number 3.

518 Step#6 Extract the genes when clustering number is 3, and rank the genes. Select the most informative  
519 genes and record them as the final set of key-gene candidates (1,294 genes).

520 We used the 1,294 genes to conduct unsupervised clustering analyses of the RNA-seq data for each  
521 cancer type to define TIME subtypes.

522

## 523 **TIL abundance calculation and pathway enrichment analysis**

524 A deconvolution approach (14) was used to extract the abundance of each immune cell based on their  
525 gene markers from a tumor RNA-Seq data. Pathway enrichment analysis was conducted using DAVID  
526 (<https://david.ncifcrf.gov>).

527

## 528 **Assigning ICT trial samples into TIME subtypes**

529 To assign an ICT-clinical trial sample into a TIME subtype, t-test statistics were first conducted in TIME-  
530 rich vs TIME-intermediate and TIME-intermediate vs TIME-poor tumors' RNA-seq data for the genes  
531 derived from the NK cell-mediated cytotoxicity pathway and the Wnt signaling pathway. The  
532 significantly differential genes (p<0.05) were used for conduct K-nearest neighbors (KNN, k=5) to assign  
533 the sample to a TIME subtype. Spearman's rank correlation was conducted between the sample and the

534 samples in each TIME subtype based on the differential genes. TCGA-SKCM and TCGA-STAD samples  
535 were used for assigning the ICT-clinical trial samples of SKCM and STAD, respectively.

536

## 537 **References**

- 538 1. Fallahpour S, Navaneelan T, De P, Borgo A. Breast cancer survival by molecular subtype: a  
539 population-based analysis of cancer registry data. *CMAJ open* 2017, **5**(3): E734-E739.  
540
- 541 2. Gao JJ, Swain SM. Luminal A Breast Cancer and Molecular Assays: A Review. *The oncologist*  
542 2018, **23**(5): 556-565.  
543
- 544 3. Zaman N, Li L, Jaramillo ML, Sun Z, Tibiche C, Banville M, *et al.* Signaling network  
545 assessment of mutations and copy number variations predict breast cancer subtype-specific drug  
546 targets. *Cell reports* 2013, **5**(1): 216-223.  
547
- 548 4. Haque R, Ahmed SA, Inzhakova G, Shi J, Avila C, Polikoff J, *et al.* Impact of breast cancer  
549 subtypes and treatment on survival: an analysis spanning two decades. *Cancer epidemiology,*  
550 *biomarkers & prevention : a publication of the American Association for Cancer Research,*  
551 *cosponsored by the American Society of Preventive Oncology* 2012, **21**(10): 1848-1855.  
552
- 553 5. Sharma P, Allison JP. The future of immune checkpoint therapy. *Science* 2015, **348**(6230): 56-  
554 61.  
555
- 556 6. Postow MA, Callahan MK, Wolchok JD. Immune Checkpoint Blockade in Cancer Therapy. *J*  
557 *Clin Oncol* 2015, **33**(17): 1974-U1161.  
558
- 559 7. Peng D, Kryczek I, Nagarsheth N, Zhao L, Wei S, Wang W, *et al.* Epigenetic silencing of TH1-  
560 type chemokines shapes tumour immunity and immunotherapy. *Nature* 2015, **527**(7577): 249-  
561 253.  
562
- 563 8. Ribas A, Dummer R, Puzanov I, VanderWalde A, Andtbacka RHI, Michielin O, *et al.*  
564 Oncolytic Virotherapy Promotes Intratumoral T Cell Infiltration and Improves Anti-PD-1  
565 Immunotherapy (vol 170, 1109.e1, 2017). *Cell* 2018, **174**(4): 1031-1032.  
566
- 567 9. Pahl J, Cerwenka A. Tricking the balance: NK cells in anti-cancer immunity. *Immunobiology*  
568 2017, **222**(1): 11-20.  
569
- 570 10. Malmberg KJ, Carlsten M, Bjorklund A, Sohlberg E, Bryceson YT, Ljunggren HG. Natural  
571 killer cell-mediated immunosurveillance of human cancer. *Seminars in immunology* 2017, **31**:  
572 20-29.  
573
- 574 11. Bryceson YT, Chiang SC, Darmanin S, Fauriat C, Schlums H, Theorell J, *et al.* Molecular  
575 mechanisms of natural killer cell activation. *Journal of innate immunity* 2011, **3**(3): 216-226.  
576
- 577 12. Patel SJ, Sanjana NE, Kishton RJ, Eidizadeh A, Vodnala SK, Cam M, *et al.* Identification of  
578 essential genes for cancer immunotherapy. *Nature* 2017, **548**(7669): 537-+.  
579

- 580 13. Rock KL, Reits E, Neefjes J. Present Yourself! By MHC Class I and MHC Class II Molecules.  
581 *Trends Immunol* 2016, **37**(11): 724-737.  
582
- 583 14. Charoentong P, Finotello F, Angelova M, Mayer C, Efremova M, Rieder D, *et al.* Pan-cancer  
584 Immunogenomic Analyses Reveal Genotype-Immunophenotype Relationships and Predictors  
585 of Response to Checkpoint Blockade. *Cell reports* 2017, **18**(1): 248-262.  
586
- 587 15. Wang E, Zaman N, McGee S, Milanese JS, Masoudi-Nejad A, O'Connor-McCourt M.  
588 Predictive genomics: a cancer hallmark network framework for predicting tumor clinical  
589 phenotypes using genome sequencing data. *Seminars in cancer biology* 2015, **30**: 4-12.  
590
- 591 16. Jean-Sebastien Milanese CT, Naif Zaman, Jinfeng Zou, Pengyong Han, Zhi Gang Meng, Andre  
592 Nantel, Arnaud Droit, Edwin Wang. Germline genomic landscapes of breast cancer patients  
593 significantly predict clinical outcomes. *bioRxiv* 2018.  
594
- 595 17. Jean-Sebastien Milanese CT, Naif Zaman, Jinfeng Zou, Pengyong Han, Zhiganag Meng, Andre  
596 Nantel, Arnaud Droit, Edwin Wang. eTumorMetastasis, a network-based algorithm predicts  
597 clinical outcomes using whole-exome sequencing data of cancer patients. *bioRxiv*.  
598
- 599 18. Jinfeng Zou EW. eTumorRisk, an algorithm predicts cancer risk based on co-mutated gene  
600 networks in an individual's germline genome. 2018.  
601
- 602 19. Orange JS. Natural killer cell deficiency. *The Journal of allergy and clinical immunology* 2013,  
603 **132**(3): 515-525.  
604
- 605 20. Mace EM, Orange JS. Genetic Causes of Human NK Cell Deficiency and Their Effect on NK  
606 Cell Subsets. *Frontiers in immunology* 2016, **7**: 545.  
607
- 608 21. Mandal A, Viswanathan C. Natural killer cells: In health and disease. *Hematology/oncology*  
609 *and stem cell therapy* 2015, **8**(2): 47-55.  
610
- 611 22. Long EO, Kim HS, Liu D, Peterson ME, Rajagopalan S. Controlling natural killer cell  
612 responses: integration of signals for activation and inhibition. *Annual review of immunology*  
613 2013, **31**: 227-258.  
614
- 615 23. Watzl C, Long EO. Signal transduction during activation and inhibition of natural killer cells.  
616 *Current protocols in immunology* 2010, **Chapter 11**: Unit 11 19B.  
617
- 618 24. Moretta A, Bottino C, Vitale M, Pende D, Cantoni C, Mingari MC, *et al.* Activating receptors  
619 and coreceptors involved in human natural killer cell-mediated cytotoxicity. *Annual review of*  
620 *immunology* 2001, **19**: 197-223.  
621
- 622 25. Biassoni R. Human natural killer receptors, co-receptors, and their ligands. *Current protocols in*  
623 *immunology* 2009, **Chapter 14**: Unit 14 10.  
624
- 625 26. Abel AM, Yang C, Thakar MS, Malarkannan S. Natural Killer Cells: Development, Maturation,  
626 and Clinical Utilization. *Frontiers in immunology* 2018, **9**: 1869.  
627

- 628 27. Neesse A, Bauer CA, Ohlund D, Lauth M, Buchholz M, Michl P, *et al.* Stromal biology and  
629 therapy in pancreatic cancer: ready for clinical translation? *Gut* 2018.  
630
- 631 28. Bottcher JP, Bonavita E, Chakravarty P, Blees H, Cabeza-Cabrerizo M, Sammicheli S, *et al.*  
632 NK Cells Stimulate Recruitment of cDC1 into the Tumor Microenvironment Promoting Cancer  
633 Immune Control. *Cell* 2018, **172**(5): 1022-1037 e1014.  
634
- 635 29. Liang SZ, Xu KC, Niu LZ, Wang XH, Liang YQ, Zhang MJ, *et al.* Comparison of autogeneic  
636 and allogeneic natural killer cells immunotherapy on the clinical outcome of recurrent breast  
637 cancer. *Oncotargets Ther* 2017, **10**: 4273-4281.  
638
- 639 30. Mao Y, Qu Q, Zhang Y, Liu J, Chen X, Shen K. The value of tumor infiltrating lymphocytes  
640 (TILs) for predicting response to neoadjuvant chemotherapy in breast cancer: a systematic  
641 review and meta-analysis. *PloS one* 2014, **9**(12): e115103.  
642
- 643 31. Denkert C, Loibl S, Noske A, Roller M, Muller BM, Komor M, *et al.* Tumor-associated  
644 lymphocytes as an independent predictor of response to neoadjuvant chemotherapy in breast  
645 cancer. *J Clin Oncol* 2010, **28**(1): 105-113.  
646
- 647 32. Oda N, Shimazu K, Naoi Y, Morimoto K, Shimomura A, Shimoda M, *et al.* Intratumoral  
648 regulatory T cells as an independent predictive factor for pathological complete response to  
649 neoadjuvant paclitaxel followed by 5-FU/epirubicin/cyclophosphamide in breast cancer  
650 patients. *Breast cancer research and treatment* 2012, **136**(1): 107-116.  
651
- 652 33. Miyashita M, Sasano H, Tamaki K, Chan M, Hirakawa H, Suzuki A, *et al.* Tumor-infiltrating  
653 CD8+ and FOXP3+ lymphocytes in triple-negative breast cancer: its correlation with  
654 pathological complete response to neoadjuvant chemotherapy. *Breast cancer research and  
655 treatment* 2014, **148**(3): 525-534.  
656
- 657 34. Azimi F, Scolyer RA, Rumcheva P, Moncrieff M, Murali R, McCarthy SW, *et al.* Tumor-  
658 infiltrating lymphocyte grade is an independent predictor of sentinel lymph node status and  
659 survival in patients with cutaneous melanoma. *J Clin Oncol* 2012, **30**(21): 2678-2683.  
660
- 661 35. Li LY, Cui JW, Wang C, Wang YZ, Niu C, Yao C, *et al.* Adoptive transfer of NK cells in  
662 combination with chemotherapy to improve outcomes of patients with locally advanced colon  
663 carcinoma. *J Clin Oncol* 2017, **35**.  
664
- 665 36. Multhoff MSEPBNNLYYMIGBMG. P04.02 Adoptive transfer of lymphokine activated NK cells  
666 in combination with anti-PD-1 immune checkpoint inhibitor in therapy of glioblastoma. *Neuro-  
667 Oncology*, **20**(suppl\_3): iii278.  
668
- 669 37. Spranger S, Bao R, Gajewski TF. Melanoma-intrinsic beta-catenin signalling prevents anti-  
670 tumour immunity. *Nature* 2015, **523**(7559): 231-235.  
671
- 672 38. Grasso CS, Giannakis M, Wells DK, Hamada T, Mu XJ, Quist M, *et al.* Genetic Mechanisms of  
673 Immune Evasion in Colorectal Cancer. *Cancer discovery* 2018, **8**(6): 730-749.  
674

- 675 39. Imai K, Matsuyama S, Miyake S, Suga K, Nakachi K. Natural cytotoxic activity of peripheral-  
676 blood lymphocytes and cancer incidence: an 11-year follow-up study of a general population.  
677 *Lancet* 2000, **356**(9244): 1795-1799.  
678
- 679 40. Montelli TC, Peracoli MT, Gabarra RC, Soares AM, Kurokawa CS. Familial cancer: depressed  
680 NK-cell cytotoxicity in healthy and cancer affected members. *Arquivos de neuro-psiquiatria*  
681 2001, **59**(1): 6-10.  
682
- 683 41. Strayer DR, Carter WA, Brodsky I. Familial occurrence of breast cancer is associated with  
684 reduced natural killer cytotoxicity. *Breast cancer research and treatment* 1986, **7**(3): 187-192.  
685
- 686 42. Bovbjerg DH, Valdimarsdottir H. Familial cancer, emotional distress, and low natural cytotoxic  
687 activity in healthy women. *Annals of oncology : official journal of the European Society for*  
688 *Medical Oncology* 1993, **4**(9): 745-752.  
689
- 690 43. Ballas ZK, Buchta CM, Rosean TR, Heusel JW, Shey MR. Role of NK cell subsets in organ-  
691 specific murine melanoma metastasis. *PloS one* 2013, **8**(6): e65599.  
692
- 693 44. Ohkuma T, Peters SAE, Woodward M. Sex differences in the association between diabetes and  
694 cancer: a systematic review and meta-analysis of 121 cohorts including 20 million individuals  
695 and one million events. *Diabetologia* 2018, **61**(10): 2140-2154.  
696
- 697 45. Steele CB, Thomas CC, Henley SJ, Massetti GM, Galuska DA, Agurs-Collins T, *et al.* Vital  
698 Signs: Trends in Incidence of Cancers Associated with Overweight and Obesity - United States,  
699 2005-2014. *MMWR Morbidity and mortality weekly report* 2017, **66**(39): 1052-1058.  
700
- 701 46. Gross AL, Gallo JJ, Eaton WW. Depression and cancer risk: 24 years of follow-up of the  
702 Baltimore Epidemiologic Catchment Area sample. *Cancer causes & control : CCC* 2010,  
703 **21**(2): 191-199.  
704
- 705 47. Batty GD, Russ TC, Stamatakis E, Kivimaki M. Psychological distress in relation to site  
706 specific cancer mortality: pooling of unpublished data from 16 prospective cohort studies. *Bmj*  
707 2017, **356**: j108.  
708
- 709 48. Bahr I, Jahn J, Zipprich A, Pahlow I, Spielmann J, Kielstein H. Impaired natural killer cell  
710 subset phenotypes in human obesity. *Immunologic research* 2018, **66**(2): 234-244.  
711
- 712 49. O'Shea D, Cawood TJ, O'Farrelly C, Lynch L. Natural killer cells in obesity: impaired function  
713 and increased susceptibility to the effects of cigarette smoke. *PloS one* 2010, **5**(1): e8660.  
714
- 715 50. Wyman PA, Moynihan J, Eberly S, Cox C, Cross W, Jin X, *et al.* Association of family stress  
716 with natural killer cell activity and the frequency of illnesses in children. *Archives of pediatrics*  
717 *& adolescent medicine* 2007, **161**(3): 228-234.  
718
- 719 51. Riaz N, Havel JJ, Makarov V, Desrichard A, Urba WJ, Sims JS, *et al.* Tumor and  
720 Microenvironment Evolution during Immunotherapy with Nivolumab. *Cell* 2017, **171**(4): 934-  
721 949 e916.  
722



- 723 52. Kim ST, Cristescu R, Bass AJ, Kim KM, Odegaard JI, Kim K, *et al.* Comprehensive molecular  
724 characterization of clinical responses to PD-1 inhibition in metastatic gastric cancer. *Nat Med*  
725 2018, **24**(9): 1449-+.
- 726
- 727 53. Chen DS, Mellman I. Elements of cancer immunity and the cancer-immune set point. *Nature*  
728 2017, **541**(7637): 321-330.
- 729
- 730 54. Wargo JA, Reddy SM, Reuben A, Sharma P. Monitoring immune responses in the tumor  
731 microenvironment. *Current opinion in immunology* 2016, **41**: 23-31.
- 732
- 733 55. Dunn GP, Dunn IF, Curry WT. Focus on TILs: Prognostic significance of tumor infiltrating  
734 lymphocytes in human glioma. *Cancer immunity* 2007, **7**: 12.
- 735
- 736 56. Eerola AK, Soini Y, Paakko P. A high number of tumor-infiltrating lymphocytes are associated  
737 with a small tumor size, low tumor stage, and a favorable prognosis in operated small cell lung  
738 carcinoma. *Clin Cancer Res* 2000, **6**(5): 1875-1881.
- 739
- 740 57. Vesely MD, Kershaw MH, Schreiber RD, Smyth MJ. Natural innate and adaptive immunity to  
741 cancer. *Annual review of immunology* 2011, **29**: 235-271.
- 742
- 743 58. Crispo A, Brennan P, Jockel KH, Schaffrath-Rosario A, Wichmann HE, Nyberg F, *et al.* The  
744 cumulative risk of lung cancer among current, ex- and never-smokers in European men. *British*  
745 *journal of cancer* 2004, **91**(7): 1280-1286.
- 746
- 747 59. Brennan P, Crispo A, Zaridze D, Szeszenia-Dabrowska N, Rudnai P, Lissowska J, *et al.* High  
748 cumulative risk of lung cancer death among smokers and nonsmokers in Central and Eastern  
749 Europe. *American journal of epidemiology* 2006, **164**(12): 1233-1241.
- 750
- 751 60. Bjorkstrom NK, Ljunggren HG, Michaelsson J. Emerging insights into natural killer cells in  
752 human peripheral tissues. *Nature reviews Immunology* 2016, **16**(5): 310-320.
- 753
- 754 61. Rock KL, Reits E, Neefjes J. Present Yourself! By MHC Class I and MHC Class II Molecules.  
755 *Trends in immunology* 2016, **37**(11): 724-737.
- 756
- 757 62. Pan D, Kobayashi A, Jiang P, de Andrade LF, Tay RE, Luoma AM, *et al.* A major chromatin  
758 regulator determines resistance of tumor cells to T cell-mediated killing. *Science* 2018,  
759 **359**(6377): 770-+.
- 760
- 761 63. Brock G, Datta S, Pihur V, Datta S. clValid: An R package for cluster validation. *J Stat Softw*  
762 2008, **25**(4): 1-22.
- 763
- 764
- 765
- 766
- 767
- 768



769

## 770 **Figure Legends**

771

772 **Figure 1. Clinical and cellular characteristics of the TIME subtypes.** (a) Representative heatmaps  
773 derived from the gene expression of the immune-checkpoint therapy (ICT) essential genes, showing the  
774 universal TIME subtypes in breast invasive carcinoma (BRCA), lung adenocarcinoma (LUAD) and  
775 skin cutaneous Melanoma (SKCM). The heatmaps for other cancer types are shown in Supplementary  
776 Figure 1; (b) Abundance of infiltrated immune cells in TIME subtypes across 12 types of cancers; (c)  
777 Kaplan–Meier curves of the patient groups between the TIME-rich subtype and the combined TIME-  
778 intermediate and -poor subtypes, revealing that the survival time for the patients in the TIME-rich  
779 subtype is significantly longer than those in the TIME-intermediate and -poor subtypes; and (d)  
780 Pathway enriched analysis derived from the significantly differential genes of RNA-seq data between  
781 the TIME-rich subtype and the TIME-intermediate and -poor subtypes. The digital numbers represent  
782 FDR-corrected p values.

783

784 **Figure 2. Heatmaps representing the enrichment pathways derived from functional germline**  
785 **genomic variants.** (a) A heatmap shows the significantly enriched pathways derived from the  
786 significantly differential germline variants between TIME-rich and TIME-intermediate-poor subtypes  
787 in 13 cancer types. (b) A heatmap shows the significantly enriched pathways derived from the  
788 significantly differential germline variants between non-cancer individuals and TIME-intermediate-  
789 poor patients in 13 cancer types. The digital numbers represent FDR-corrected p values.

790

791 **Figure 3. The associations between the inherited detected NK cells and clinical outcomes, and the**  
792 **abundance of infiltrated immune cells in TIMEs.** (a) Kaplan–Meier curves of the patient groups of  
793 the high- and low-number of functionally inherited variants in the NK cells for disease-free survival.  
794 Patients were top-to-bottom ranked based on the number of functionally inherited variants in NK cells.  
795 Top 40% and bottom 40% of the ranked patients were defined as high- and a low number of the NK  
796 cell defected patient groups, respectively. (b) Negative correlations between the number of the NK cell  
797 inheritable defected and the abundance of the infiltrated immune cells in TIMEs. Breast invasive  
798 carcinoma (BRCA), lung adenocarcinoma (LUAD) and skin cutaneous Melanoma (SKCM). The  
799 survival differences for other types of cancer are shown in Supplementary Figure 6. \*p-value >0.05;  
800 \*\*0.05>p-value >0.001; and \*\*\*p-value<0.001. The NK-specific-genes included NKD genes and NK

801 receptors/ligands of the 103 defected NK cell genes, while the NK-immune-universal-genes included  
802 the global immune cell genes and the universal genes of the 103 defected NK cell genes.  
803

804

805

806 **Fig 1a**

807

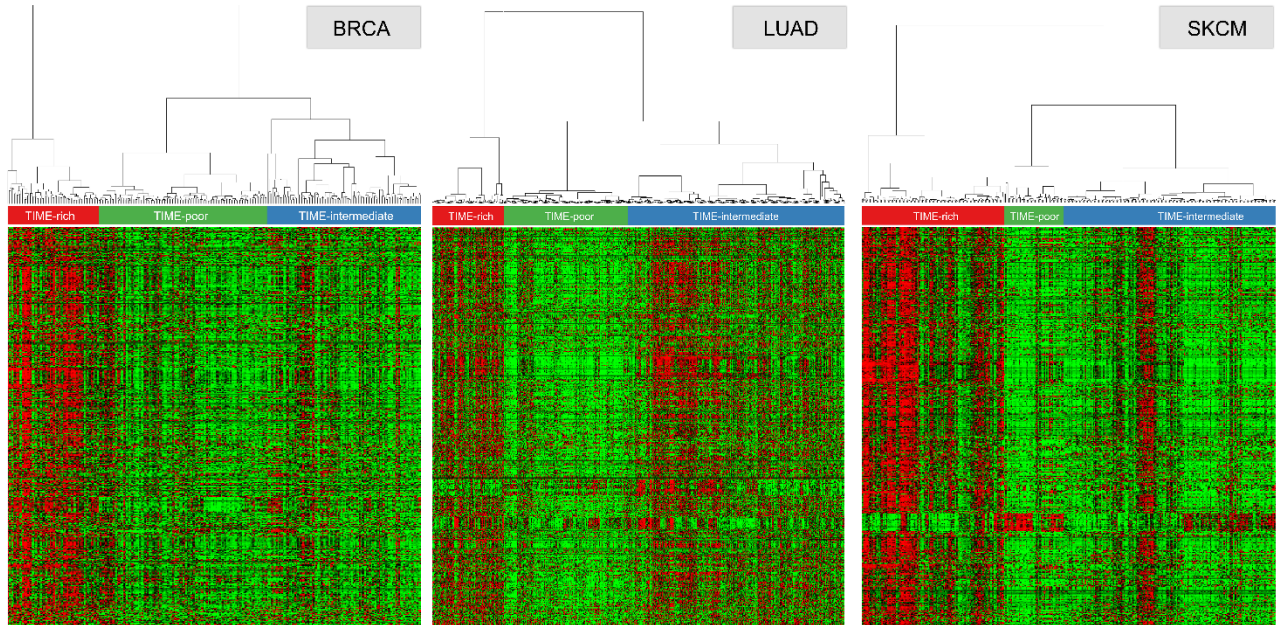

808

809

810

811 **Fig 1b**

812

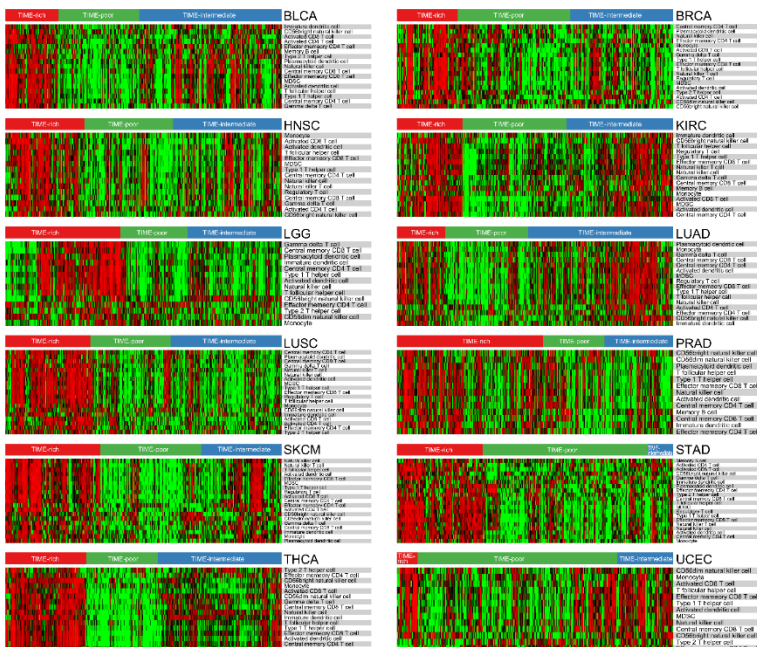

813

814

815

816 **Fig 1c**

817

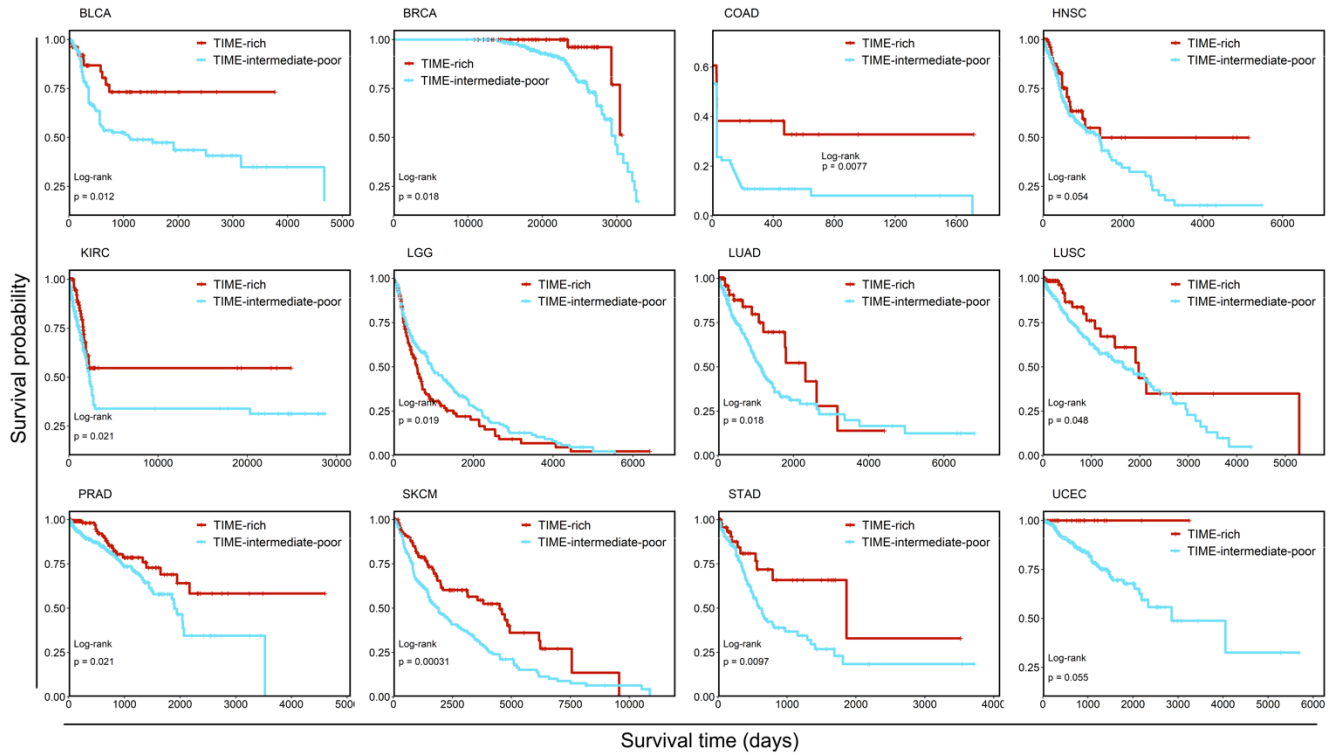

818

819

820

821

822

823

824

825 **Fig 1d**

826

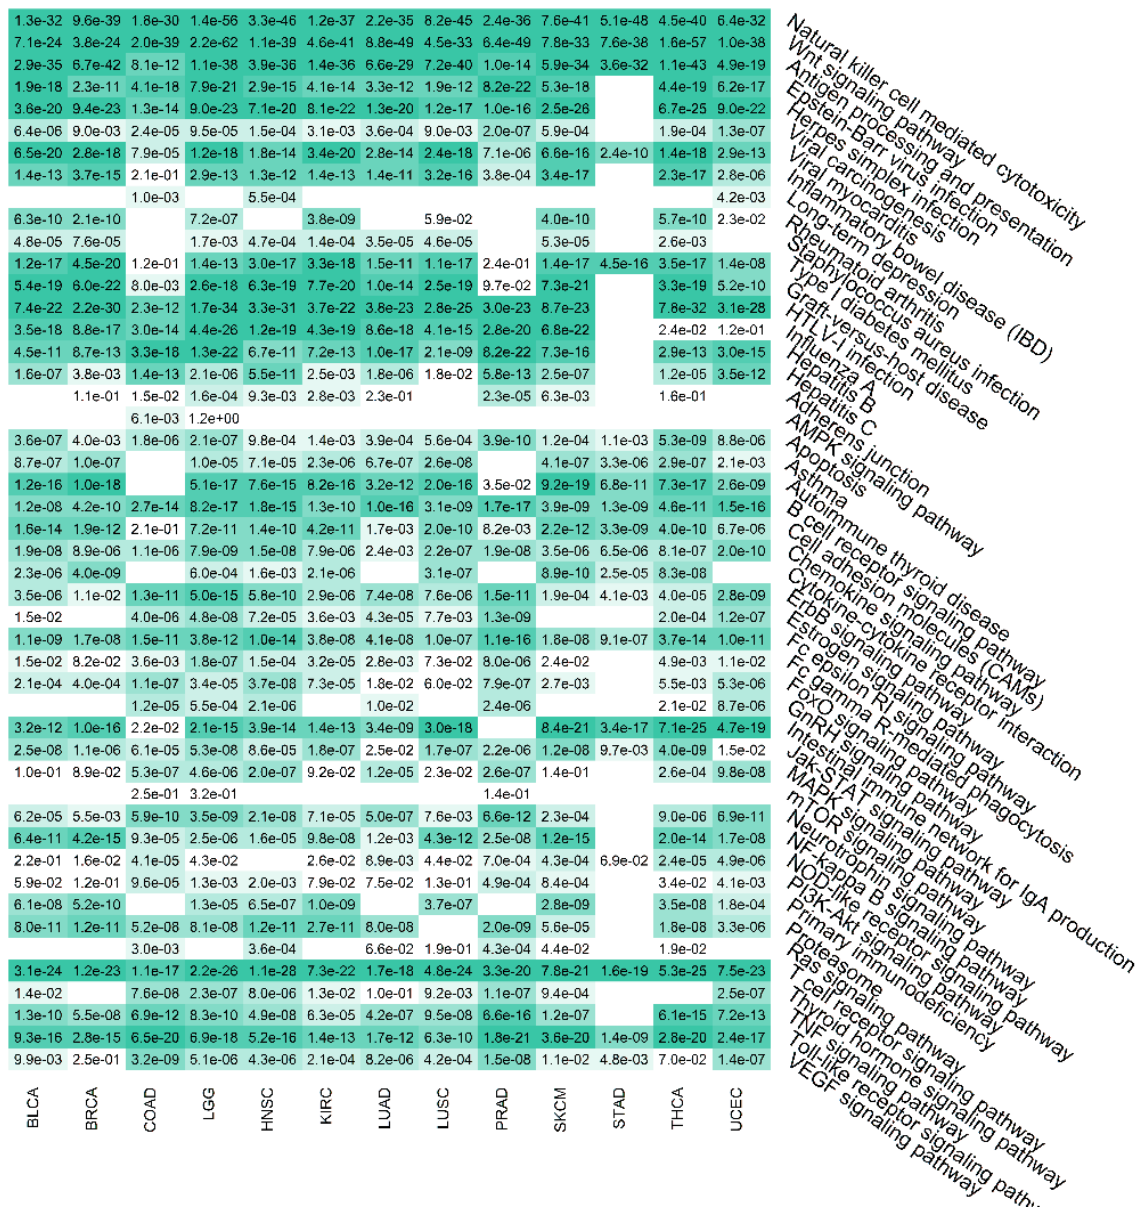

827

828

829

830

831

832



833  
834  
835  
836

**Fig 2a**

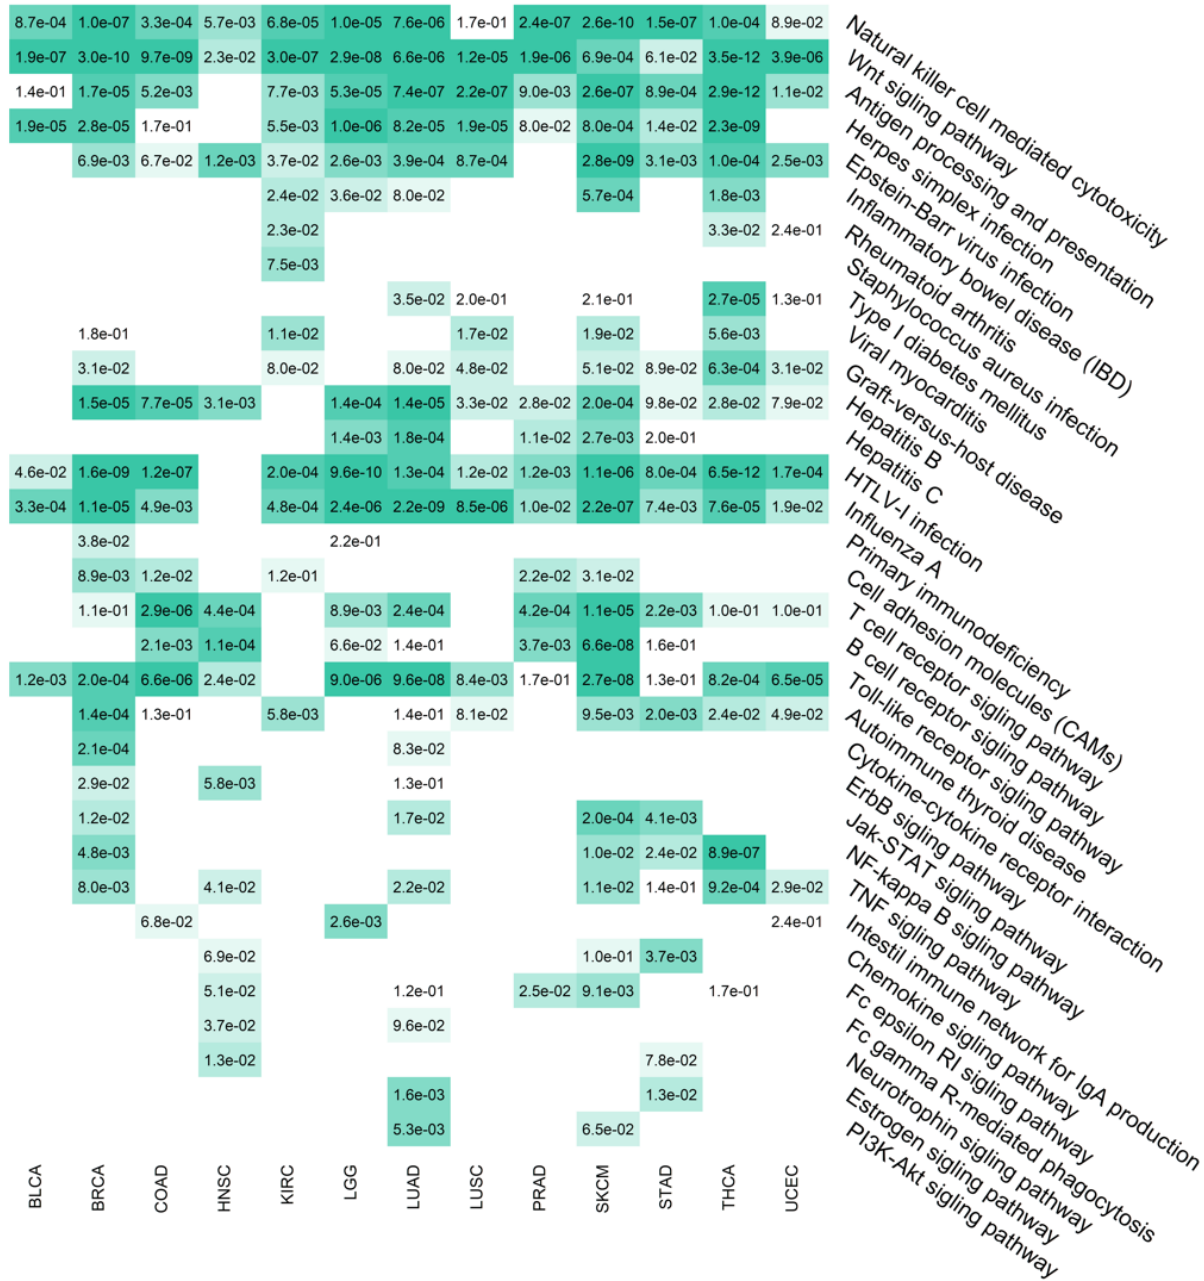

837  
838  
839  
840  
841  
842

843

844 **Fig 2b**

845

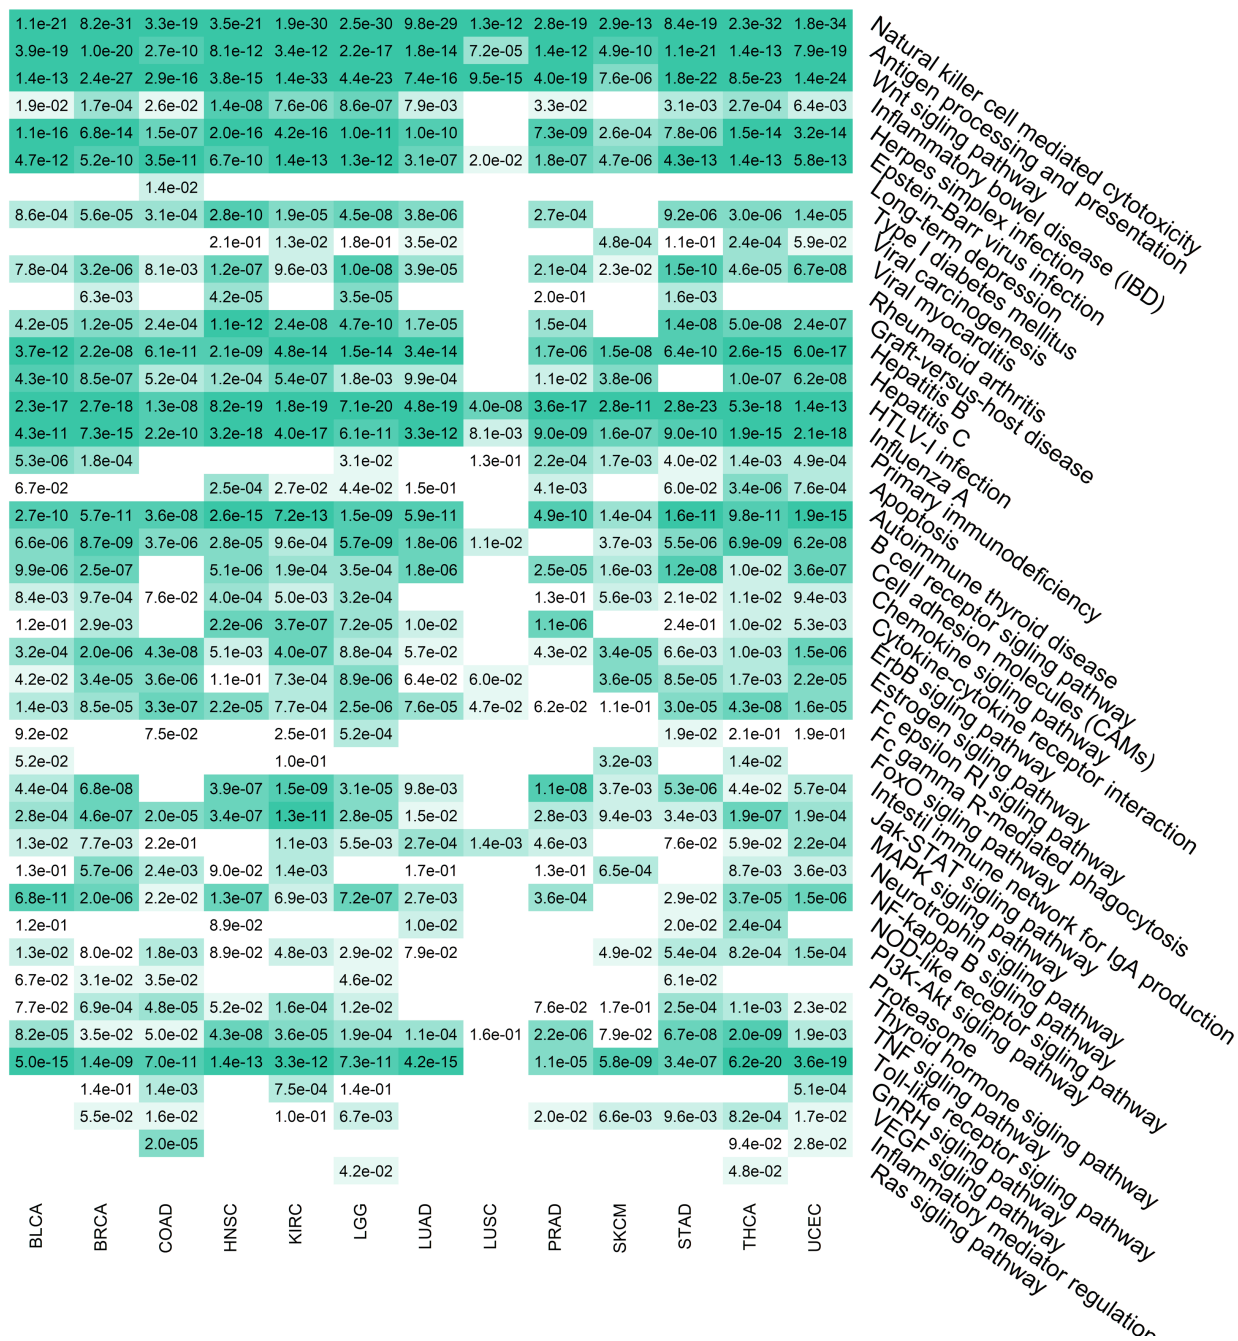

846

847

848

849

850

851



852

853

854 **Fig 3a**

855

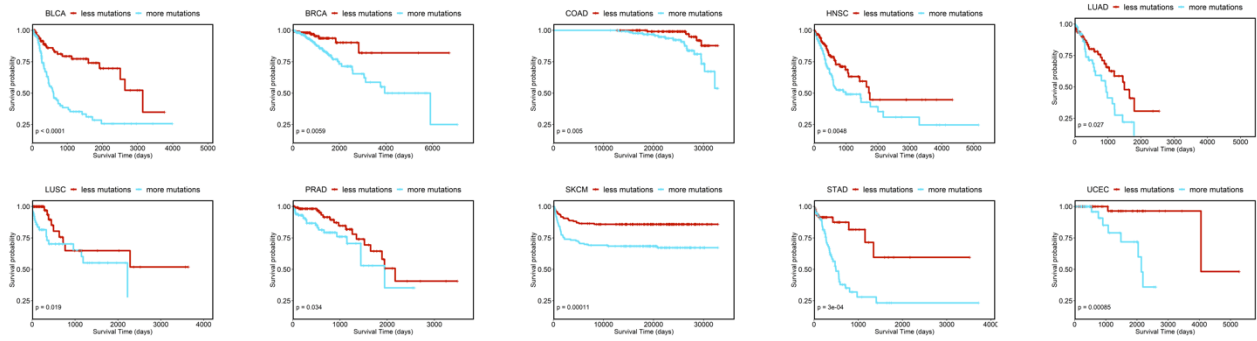

856

857

858

859

860

861

862

863

864

865

866

867

868

869

870

871

872

873

874

875

876

877

878 **Fig 3b**

879

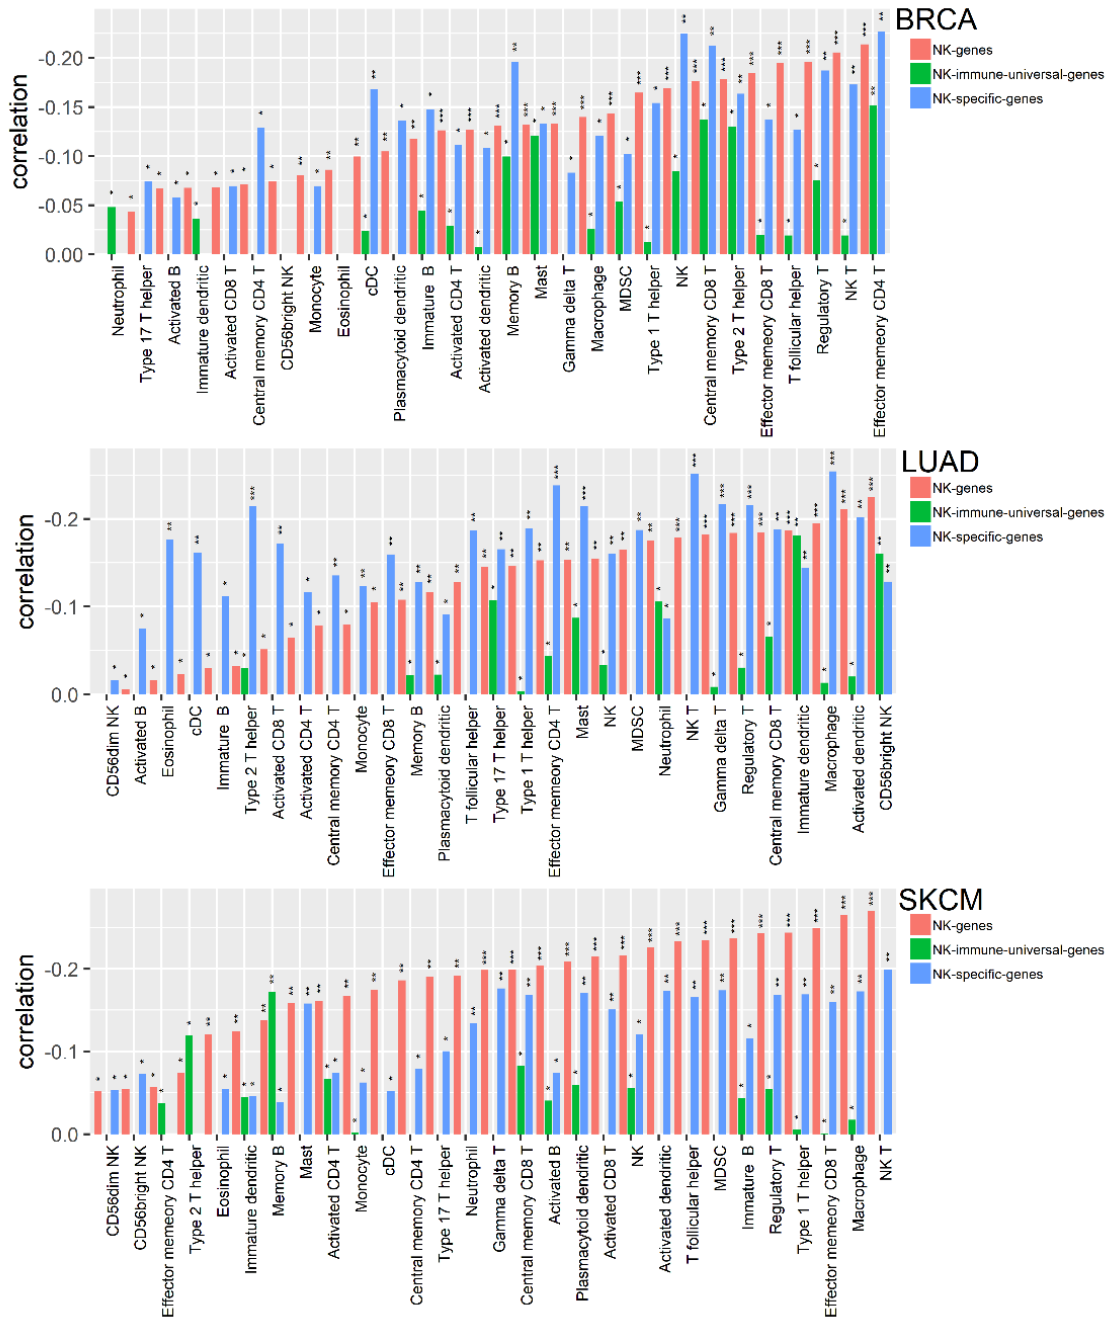

880

881
